# Supplementary material
Source: PubMed Central journal article supplement (PMC3124691)
Supplement: 97320630006266S1.pdf [file 97320630006266S1.pdf]

## Supplementary material:

$P_{epitope}$  is calculated as:

$$P_{epitope} = \frac{\text{Number of amino acid differences in the epitope}}{\text{Total number of amino acids in the epitope}}$$

**Table 1:** Identity (Similarity) of amino acid composition in HA protein sequences of selected strains

|       | X-31*     | UKR63     | ALB70     | PC73      | PH82      | SYD97     | MOS99     | WIS05     | BR07     |
|-------|-----------|-----------|-----------|-----------|-----------|-----------|-----------|-----------|----------|
| X-31* | 100(100)  |           |           |           |           |           |           |           |          |
| UKR63 | 95.8 (97) | 100(100)  |           |           |           |           |           |           |          |
| ALB70 | 98.6 (99) | 95.8 (97) | 100(100)  |           |           |           |           |           |          |
| PC73  | 96.3 (98) | 94.3 (96) | 97.2 (98) | 100(100)  |           |           |           |           |          |
| PH82  | 89.6 (94) | 88.3 (93) | 89.8 (94) | 91.7 (95) | 100(100)  |           |           |           |          |
| SYD97 | 88.3 (94) | 87.3 (93) | 89.0 (94) | 90.8 (95) | 90.3 (94) | 100(100)  |           |           |          |
| MOS99 | 89.0 (94) | 88.0 (93) | 89.4 (94) | 91.0 (95) | 90.3 (94) | 98.0 (99) | 100(100)  |           |          |
| WIS05 | 86.2 (94) | 86.4 (92) | 87.0 (93) | 88.3 (93) | 88.5 (93) | 94.3 (97) | 94.2 (97) | 100(100)  |          |
| BR07  | 86.6 (92) | 86.7 (92) | 87.0 (92) | 89.0 (93) | 89.0 (92) | 94.2 (96) | 94.0 (96) | 98.2 (99) | 100(100) |

\* X-31 corresponds to the 'Hongkong' pandemic influenza A/X-31/1968 (H3N2), the reference strain in this study.  
N.B.: Numbers denote percentages.

**Table 2:** Number of mutations in the known epitopes of HA proteins of various strains with respect to X-31

| Strain→  | UKR63 | X-31* | ALB70 | PC73 | PH82 | MOS99 | WIS05 | BR07 |
|----------|-------|-------|-------|------|------|-------|-------|------|
| ↓Epitope |       |       |       |      |      |       |       |      |
| A        | 3     | 0     | 0     | 2    | 9    | 11    | 12    | 13   |
| B        | 2     | 0     | 0     | 5    | 8    | 10    | 13    | 14   |
| C        | 0     | 0     | 0     | 1    | 6    | 8     | 8     | 8    |
| D        | 5     | 0     | 1     | 3    | 7    | 8     | 10    | 10   |
| E        | 3     | 0     | 2     | 2    | 4    | 9     | 10    | 11   |

**Table 3:** PROCHECK Analyses of the protein structures

| Protein structures | Sequence identity with template (%) | Occupancy* in Ramachandran plot (%) | Minimized Energy (kJ/mol) |
|--------------------|-------------------------------------|-------------------------------------|---------------------------|
| ALB70              | 98.53                               | 98.4                                | -28835.67                 |
| PC73               | 98.36                               | 98.1                                | -28797.88                 |
| PH82               | 91.29                               | 97.9                                | -28579.02                 |
| MOS99              | 88.06                               | 98.0                                | -29832.88                 |
| WIS05              | 84.50                               | 98.2                                | -29397.53                 |
| BR07               | 86.60                               | 98.2                                | -29148.36                 |
| X-31 (1EO8)        | 100                                 | 99.5                                | -28233.07                 |

\*N.B. Occupancy in Ramachandran Plot denotes the percentage of amino acids in the favourable and generously allowed regions

**Table 4:** List of contacts between antibody BH151 and the antigens

| X-31 |       |                  |             | ALB70 |       |                  |             |
|------|-------|------------------|-------------|-------|-------|------------------|-------------|
| Ag   | Ab    | Interaction Type | Distance[Å] | Ag    | Ab    | Interaction Type | Distance[Å] |
| HA1  | BH151 |                  |             | HA1   | BH151 |                  |             |
| D76  | Y32   | H-Bond           | 2.97        | N112  | T31   | H-Bond           | 0.5         |
| D79  | R94   | H-Bond           | 2.74        | K156  | Y32   | H-Bond           | 2.5         |
| H91  | W100  | H-Bond           | 2.78        | D93   | R98   | H-Bond           | 1.8         |
| D287 | T31   | H-Bond           | 2.82        | P90   | R98   | H-Bond           | 3.2         |
| D79  | R94   | Salt Bridge      | 2.7         | K156  | G26   | H-Bond           | 2.6         |
| E98  | R98   | Salt Bridge      | 3.7         |       |       |                  |             |

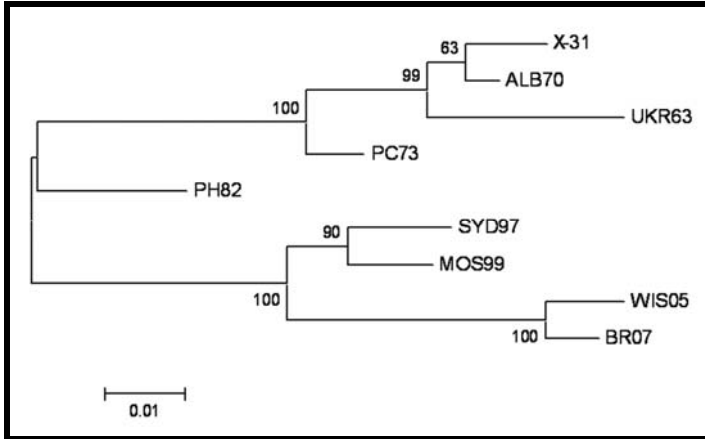

**Figure S1:** Phylogenetic tree (Neighbor-Joining) of HA protein sequences of selected H3N2 strains (with bootstrap analysis as test of phylogeny with 10000 replications) as obtained from MEGA 4.0.

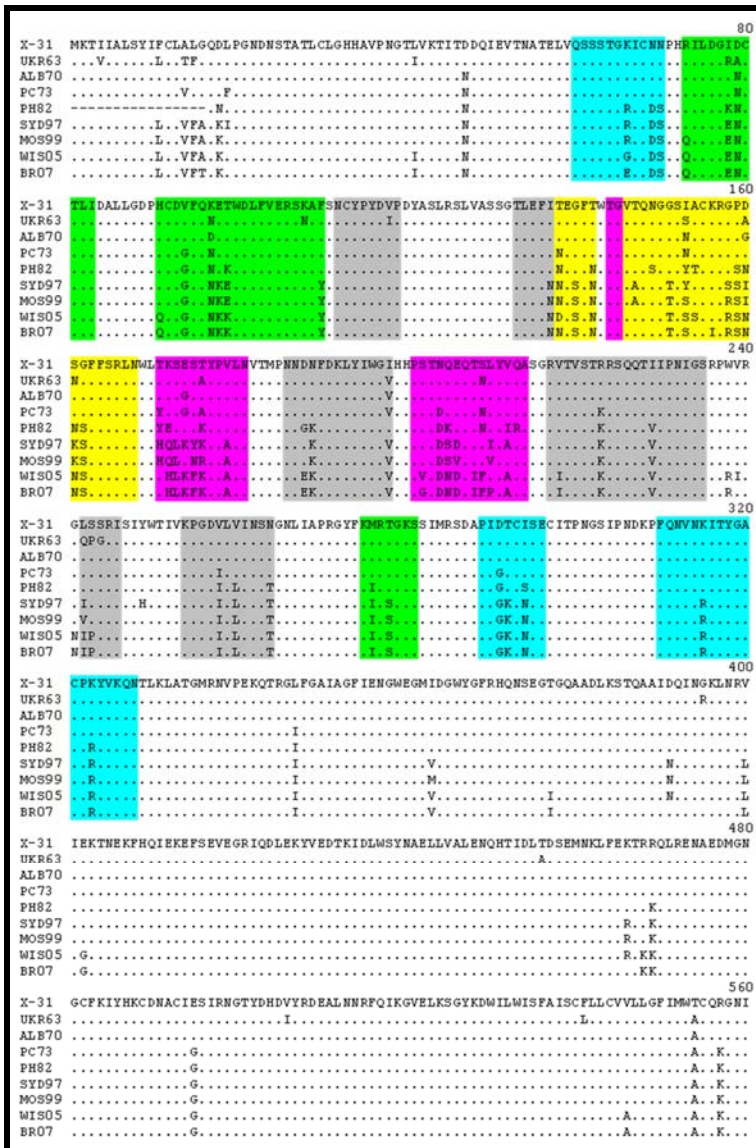

**Figure S2:** Multiple alignment of Hemagglutinin (HA) protein sequences from H3N2 strains. Epitopes A, B, C, D and E are highlighted in Yellow, Pink, Cyan, Grey and Green respectively. All references to amino acid numbering in the text are in accordance with sequence nomenclature followed in this alignment.
